# Supplementary material
Source: PubMed Central journal article supplement (PMC3876204)
Supplement: 1314859111_pnas.201314859SI.pdf [file 1314859111_pnas.201314859SI.pdf]

# Supporting Information

Jenkinson et al. 10.1073/pnas.1314859111

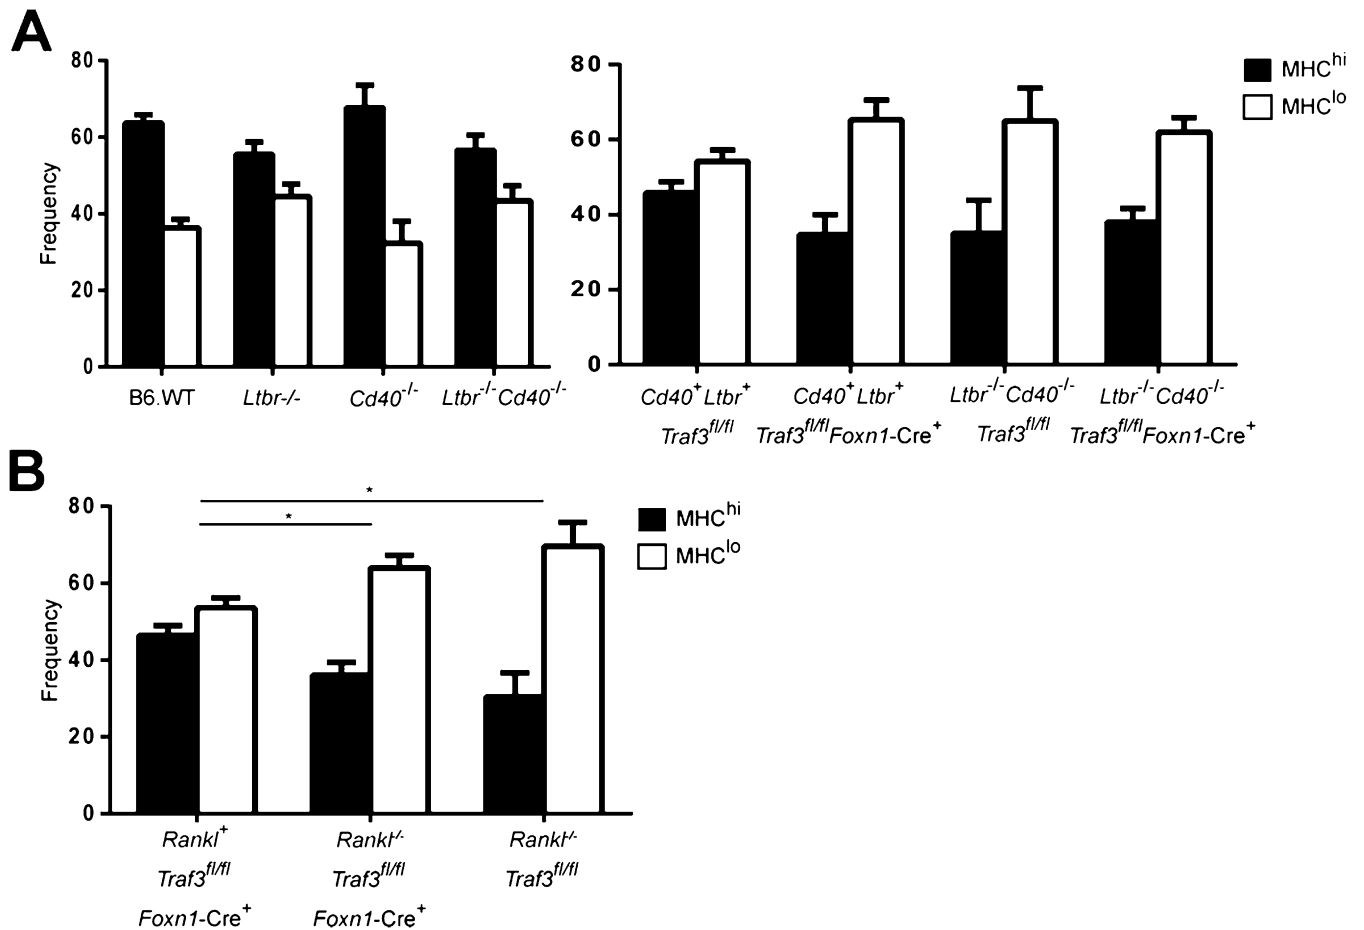

**Fig. S1.** Percentages of MHC II<sup>hi</sup> and MHC II<sup>lo</sup> medullary thymic epithelial cells (mTECs) from mouse strains shown in Figs. 4 and 5. Thymic stromal cells were prepared as described in Figs. 4 (A) and 5 (B). After gating on CD45<sup>neg</sup>, MHC II<sup>+</sup> UEA<sup>+</sup> mTECs, percentages of MHC II<sup>hi</sup> and MHC II<sup>lo</sup> mTECs were calculated for each group. Data shown are mean ± SE for ≥3 mice per strain. (t test; \*P < 0.05).
